# Supplementary material for: Effects of a lifestyle intervention during pregnancy to prevent excessive gestational weight gain in routine care – the cluster-randomised GeliS trial
Source: Springer Nature journal article supplement (doi:10.1186/s12916-018-1235-z), 2019-01-08
Supplement: MOESM1 [file 16396412]

**Supplemental Table 1: Per-protocol and multiple imputation analyses of excessive gestational weight gain**

|                                           | Control         | Intervention    | Absolute effect size <sup>1</sup> (95% CI) | p value <sup>1</sup> | Adjusted effect size <sup>2</sup> (95% CI) | Adjusted p value <sup>2</sup> |
|-------------------------------------------|-----------------|-----------------|--------------------------------------------|----------------------|--------------------------------------------|-------------------------------|
| <b>Women with excessive GWG (&gt;IOM)</b> |                 |                 |                                            |                      |                                            |                               |
| Per protocol                              | 421/905 (46.5%) | 401/883 (45.4%) | 1.02(0.75,1.37)                            | 0.918                | 0.92(0.65,1.29)                            | 0.628                         |
| Multiple imputation                       |                 |                 | 1.03(0.77,1.39)                            | 0.824                | 0.95(0.68,1.33)                            | 0.754                         |

<sup>1</sup>logistic regression models fit using generalized estimating equations

<sup>2</sup>logistic regression models fit using generalized estimating equations adjusted for pre-pregnancy BMI, age, parity and gestational age at 1<sup>st</sup> visit

GWG, gestational weight gain; IOM, Institute of Medicine
