# Supplementary material for: Effects of a lifestyle intervention during pregnancy to prevent excessive gestational weight gain in routine care – the cluster-randomised GeliS trial
Source: Springer Nature journal article supplement (doi:10.1186/s12916-018-1235-z), 2019-01-08
Supplement: MOESM2 [file 16396412]

**Supplemental Table 2: Quantitative evaluation of lifestyle counselling sessions**

|                                                                 | <b>Number of participating women (intervention group)</b> | <b>Correct time interval</b> |
|-----------------------------------------------------------------|-----------------------------------------------------------|------------------------------|
| <b>Individual counselling sessions</b>                          |                                                           |                              |
| Session 1: 12 <sup>th</sup> -16 <sup>th</sup> week of gestation | 1069/1087 <sup>1</sup> ( <b>98.3%</b> )                   | 953/1069 ( <b>89.1%</b> )    |
| Session 2: 16 <sup>th</sup> -20 <sup>th</sup> week of gestation | 1047/1073 <sup>1</sup> ( <b>97.6%</b> )                   | 957/1047 ( <b>91.4%</b> )    |
| Session 3: 30 <sup>th</sup> -34 <sup>th</sup> week of gestation | 1006/1049 <sup>1</sup> ( <b>95.9%</b> )                   | 855/1006 ( <b>85.0%</b> )    |
| Session 4: 6-8 weeks postpartum                                 | 974/1039 <sup>1</sup> ( <b>93.7%</b> )                    | 759/974 ( <b>77.9%</b> )     |
| <b>Number of counselling sessions</b>                           |                                                           |                              |
| No session                                                      | 30/1099 <sup>2</sup> ( <b>2.7%</b> )                      |                              |
| One session                                                     | 21/1099 <sup>2</sup> ( <b>1.9%</b> )                      |                              |
| Two sessions                                                    | 32/1099 <sup>2</sup> ( <b>2.9%</b> )                      |                              |
| Three sessions                                                  | 54/1099 <sup>2</sup> ( <b>4.9%</b> )                      |                              |
| Four sessions                                                   | 963/1099 <sup>2</sup> ( <b>87.6%</b> )                    |                              |

<sup>1</sup>number of women in the intervention group at the time of the respective session

<sup>2</sup>number of women in the intervention group excluding women with major pregnancy complications
