# Supplementary material for: Effects of a lifestyle intervention during pregnancy to prevent excessive gestational weight gain in routine care – the cluster-randomised GeliS trial
Source: BMC Med. 2019 Jan 14;17:5. doi: 10.1186/s12916-018-1235-z (PMC6330753; doi:10.1186/s12916-018-1235-z)
Supplement: Supplementary file 3 — Table S3. Qualitative evaluation of lifestyle counselling sessions (PDF 82 kb) [file 12916_2018_1235_MOESM3_ESM.pdf]

**Supplemental Table 3: Qualitative evaluation of lifestyle counselling sessions**

| <b>Quality parameters</b>                                            |                        |
|----------------------------------------------------------------------|------------------------|
| Monitored counselling sessions (n)                                   | 53                     |
| Median duration of sessions (min)                                    | 35                     |
| Utilisation of study documents (n)                                   | 46/53 ( <b>86.8%</b> ) |
| Among study document users: completeness of counselling contents (n) | 32/46 ( <b>69.6%</b> ) |
| Weight monitoring with weight gain chart (n)                         | 39/53 ( <b>73.6%</b> ) |
| Individual counselling (n)                                           | 33/53 ( <b>62.3%</b> ) |
